# Supplementary material for: Sex determination of mummies through multi-elemental analysis of head hair using electrothermal vaporization coupled to inductively coupled plasma optical emission spectrometry
Source: Royal Society of Chemistry journal article supplement (doi:10.1039/d2ra05654b), 2022-01-01
Supplement: d2ra05654b1.pdf [file d2ra05654b1.pdf]

**Supplementary Material for:**  
**Sex Determination of Mummies through Multi-Elemental Analysis of Head Hair using Electrothermal Vaporization Coupled to Inductively Coupled Plasma Optical Emission Spectrometry**

by M. MacConnachie, S. Lu, Y. Wang, J. Williams, and D. Beauchemin

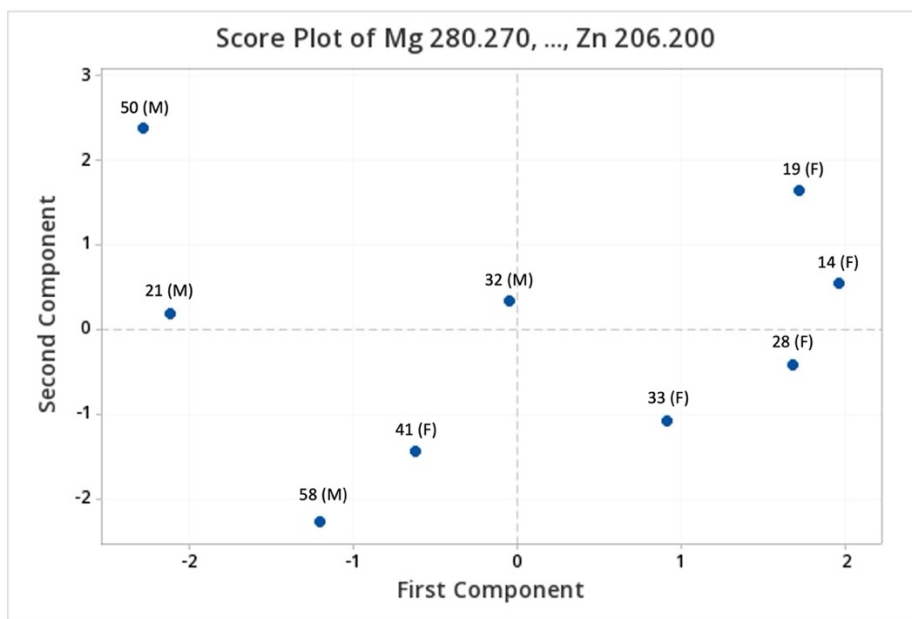

**Fig. S1** PCA score plot using Mg, S, Sr, and Zn as predictors. Only mummy hair samples have been included in the plot.

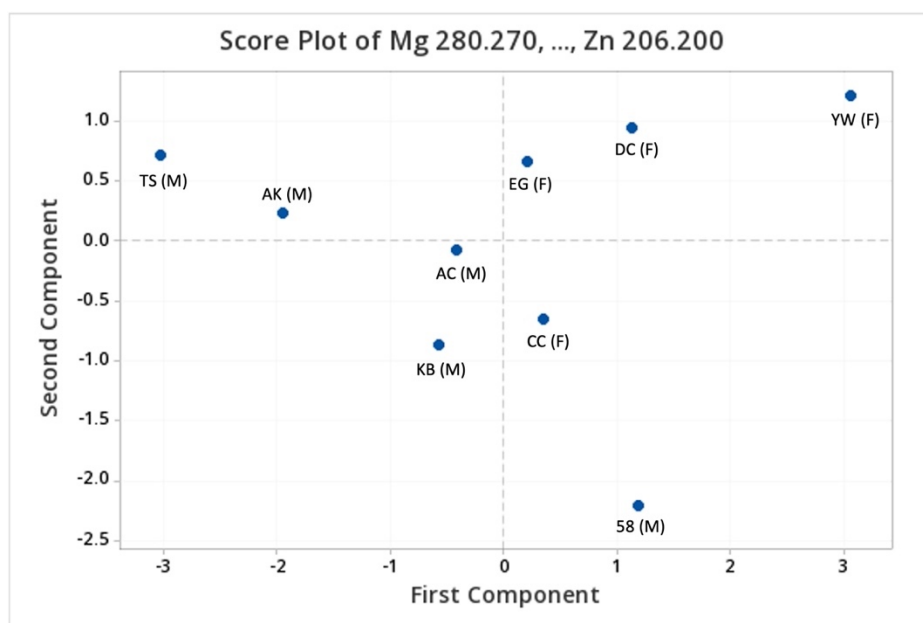

**Fig. S2** PCA score plot using Mg, S, Sr, and Zn as predictors. Eight human samples and one mummy sample (58, male) have been included in the plot.

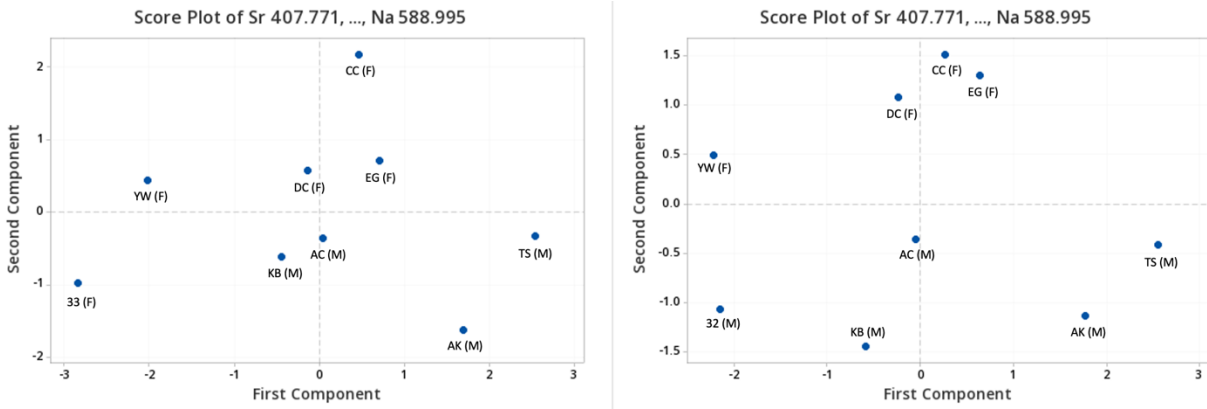

**Fig. S3** PCA score plots using Na, S, Sr, and Zn as predictors. Each score plot contains all eight human samples, and one mummy sample. The left score plot contains sample 33 (female), and the right score plot contains sample 32 (male).

**Table S1** Predictions by LDA for the nine mummy hair samples, using the other mummy hair samples as the training set, with Mg, S, Sr, Zn as predictors.

| Sample | Known Group | Probabilities | Predicted Group |
|--------|-------------|---------------|-----------------|
| 21     | Male        | Male 1.000    | Male            |
|        |             | Female 0.000  |                 |
| 58     | Male        | Male 1.000    | Male            |
|        |             | Female 0.000  |                 |
| 32     | Male        | Male 1.000    | Male            |
|        |             | Female 0.000  |                 |
| 50     | Male        | Male 1.000    | Male            |
|        |             | Female 0.000  |                 |
| 33     | Female      | Male 0.000    | Female          |
|        |             | Female 1.000  |                 |
| 41     | Female      | Male 0.000    | Female          |
|        |             | Female 1.000  |                 |
| 28     | Female      | Male 0.000    | Female          |
|        |             | Female 1.000  |                 |
| 14     | Female      | Male 0.000    | Female          |
|        |             | Female 1.000  |                 |
| 19     | Female      | Male 0.000    | Female          |
|        |             | Female 1.000  |                 |

**Table S2** Predictions by LDA for the nine mummy hair samples, using the human hair samples as the training set, with Mg, S, Sr, Zn as predictors

| Sample | Known Group | Probabilities |       | Predicted Group |
|--------|-------------|---------------|-------|-----------------|
| 21     | Male        | Male          | 1.000 | Male            |
|        |             | Female        | 0.000 |                 |
| 58     | Male        | Male          | 0.000 | Female          |
|        |             | Female        | 1.000 |                 |
| 32     | Male        | Male          | 0.000 | Female          |
|        |             | Female        | 1.000 |                 |
| 50     | Male        | Male          | 1.000 | Male            |
|        |             | Female        | 0.000 |                 |
| 33     | Female      | Male          | 0.000 | Female          |
|        |             | Female        | 1.000 |                 |
| 41     | Female      | Male          | 0.000 | Female          |
|        |             | Female        | 1.000 |                 |
| 28     | Female      | Male          | 0.000 | Female          |
|        |             | Female        | 1.000 |                 |
| 14     | Female      | Male          | 0.000 | Female          |
|        |             | Female        | 1.000 |                 |
| 19     | Female      | Male          | 0.000 | Female          |
|        |             | Female        | 1.000 |                 |

**Table S3** Predictions by LDA for the nine mummy hair samples, using the human hair samples as the training set, with Na, S, Sr, and Zn as predictors

| Sample | Known Group | Probabilities |       | Predicted Group |
|--------|-------------|---------------|-------|-----------------|
| 21     | Male        | Male          | 1.000 | Male            |
|        |             | Female        | 0.000 |                 |
| 58     | Male        | Male          | 1.000 | Male            |
|        |             | Female        | 0.000 |                 |
| 32     | Male        | Male          | 1.000 | Male            |
|        |             | Female        | 0.000 |                 |
| 50     | Male        | Male          | 1.000 | Male            |
|        |             | Female        | 0.000 |                 |
| 33     | Female      | Male          | 0.000 | Female          |
|        |             | Female        | 1.000 |                 |
| 41     | Female      | Male          | 0.000 | Female          |
|        |             | Female        | 1.000 |                 |
| 28     | Female      | Male          | 0.000 | Female          |
|        |             | Female        | 1.000 |                 |
| 14     | Female      | Male          | 0.000 | Female          |
|        |             | Female        | 1.000 |                 |
| 19     | Female      | Male          | 0.000 | Female          |
|        |             | Female        | 1.000 |                 |
